# Supplementary material for: HiCRep: assessing the reproducibility of Hi-C data using a stratum-adjusted correlation coefficient
Source: PubMed Central journal article supplement — Genome Res. 2017 Nov;27(11):1939–49. doi: 10.1101/gr.220640.117 (PMC5668950; doi:10.1101/gr.220640.117), 2017-11

**Supplemental Figure S2.** Discrimination of non-replicates (NR) from biological replicates (BR) in the H1 ES cell lineage using SCC, Pearson and Spearman correlations. For each cell line, the triangle represents the biological replicate and the boxplot represents the distribution of the corresponding NRs.

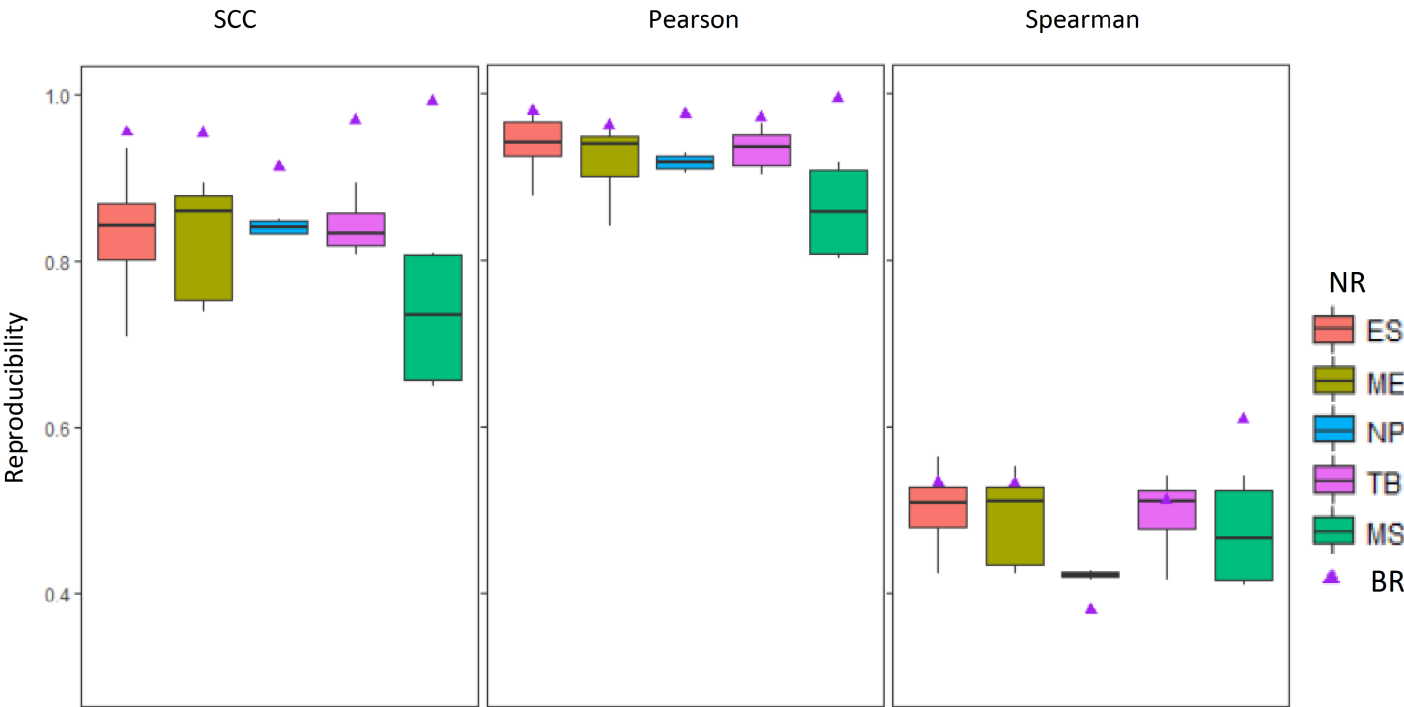

Supplement: supp_gr.220640.117_Supplemental_Fig_S2.pdf [file supp_gr.220640.117_Supplemental_Fig_S2.pdf]
