# Supplementary material for: HiCRep: assessing the reproducibility of Hi-C data using a stratum-adjusted correlation coefficient
Source: PubMed Central journal article supplement — Genome Res. 2017 Nov;27(11):1939–49. doi: 10.1101/gr.220640.117 (PMC5668950; doi:10.1101/gr.220640.117), 2017-11

**Supplemental Figure S3.** Interrelationship of ES and ES-derived cell lineages inferred by (A) SCC using bias corrected Hi-C interaction matrices, where bias correction was done using ICE (Imakaev et al. 2012), (B) SCC using raw data without smoothing, (C) Pearson correlation using smoothed interaction matrices obtained from our smoothing procedure, (D) Spearman correlation using smoothed interaction matrices obtained from our smoothing procedure.

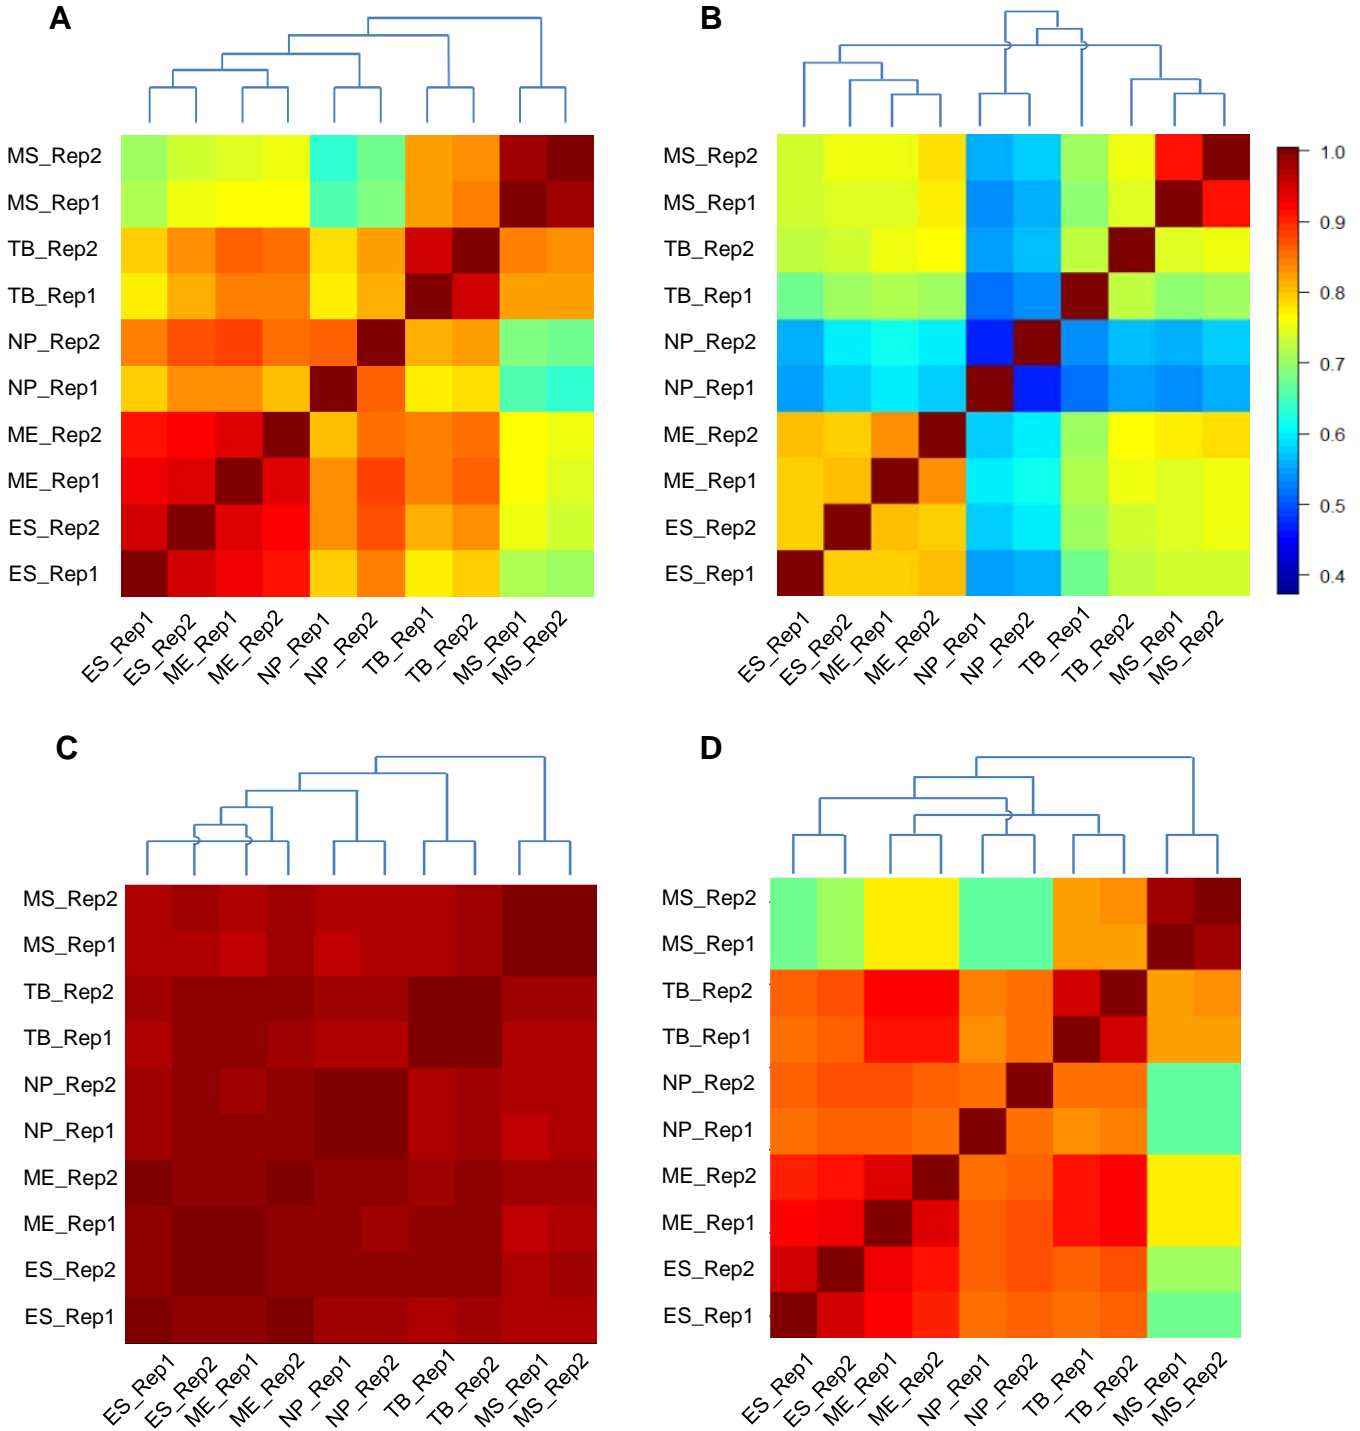

Supplement: supp_gr.220640.117_Supplemental_Fig_S3.pdf [file supp_gr.220640.117_Supplemental_Fig_S3.pdf]
