# Supplementary material for: HiCRep: assessing the reproducibility of Hi-C data using a stratum-adjusted correlation coefficient
Source: PubMed Central journal article supplement — Genome Res. 2017 Nov;27(11):1939–49. doi: 10.1101/gr.220640.117 (PMC5668950; doi:10.1101/gr.220640.117), 2017-11

**Supplemental Figure S4.** Relationship between the ten samples in the human H1 ES cell lineage estimated based on SCC using different resolutions: (A)10kb; (B)25kb; (C) 100kb; (D) 500kb; (E)1Mb.

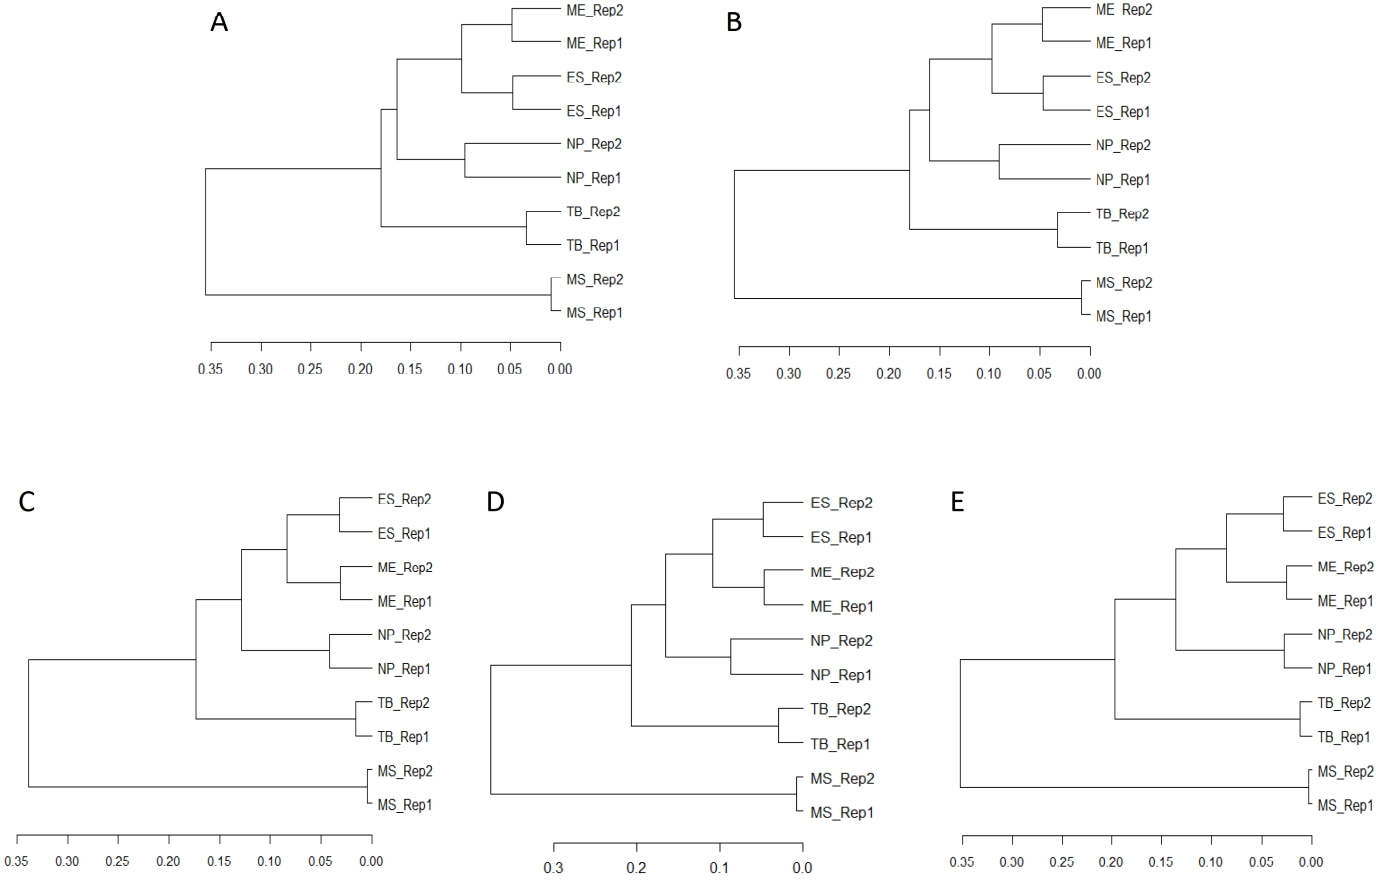

Supplement: supp_gr.220640.117_Supplemental_Fig_S4.pdf [file supp_gr.220640.117_Supplemental_Fig_S4.pdf]
