# Supplementary material for: HiCRep: assessing the reproducibility of Hi-C data using a stratum-adjusted correlation coefficient
Source: PubMed Central journal article supplement — Genome Res. 2017 Nov;27(11):1939–49. doi: 10.1101/gr.220640.117 (PMC5668950; doi:10.1101/gr.220640.117), 2017-11

**Supplemental Figure S5.** Relationship between the ten samples in the human H1 ES cell lineage estimated using interactions at different distance ranges, (A) 0-4M, (B) 0-6M, (C) 0-8M, and (D) 0-10M by SCC (Left), Pearson (Middle) and Spearman (Right).

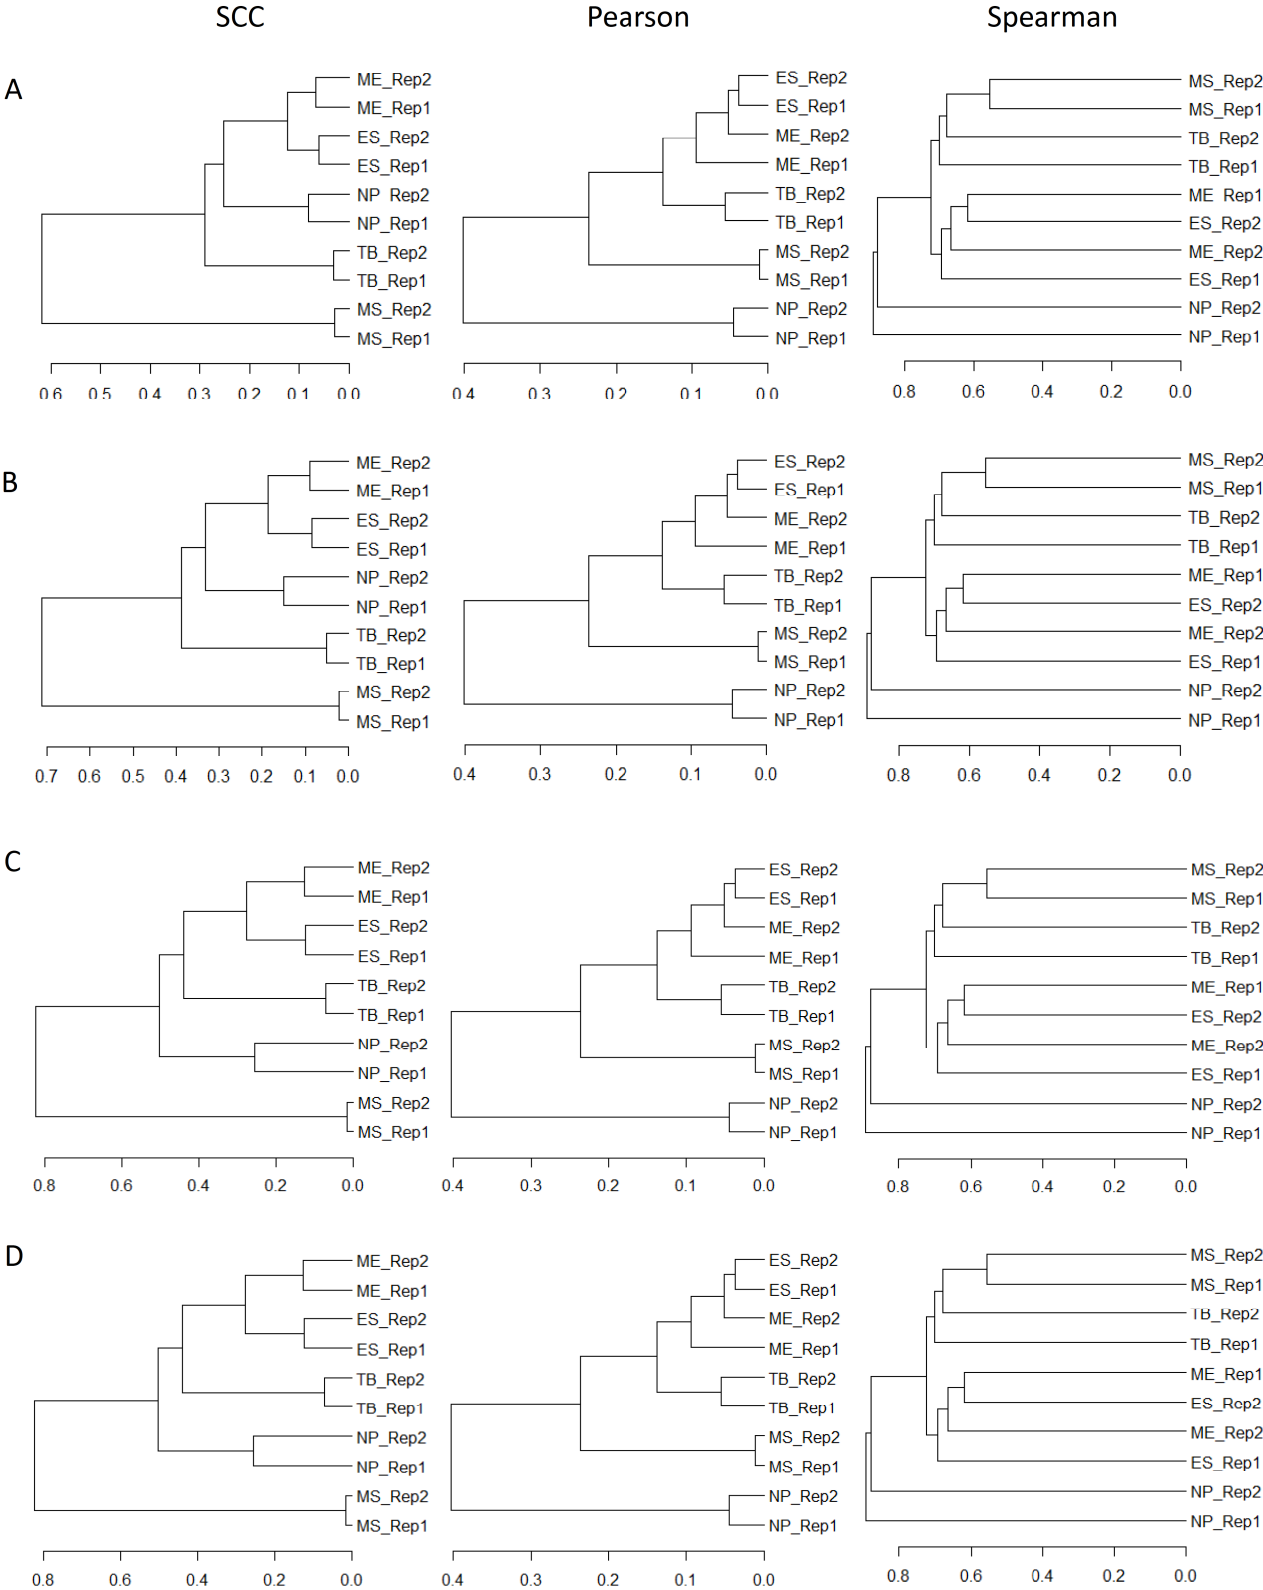

Supplement: supp_gr.220640.117_Supplemental_Fig_S5.pdf [file supp_gr.220640.117_Supplemental_Fig_S5.pdf]
