# Supplementary material for: HiCRep: assessing the reproducibility of Hi-C data using a stratum-adjusted correlation coefficient
Source: PubMed Central journal article supplement — Genome Res. 2017 Nov;27(11):1939–49. doi: 10.1101/gr.220640.117 (PMC5668950; doi:10.1101/gr.220640.117), 2017-11

**Supplemental Figure S6.** Contact maps of the human H1 ES cell Hi-C matrix (chromosome 22: 17080000-51320000) at different smoothing levels.

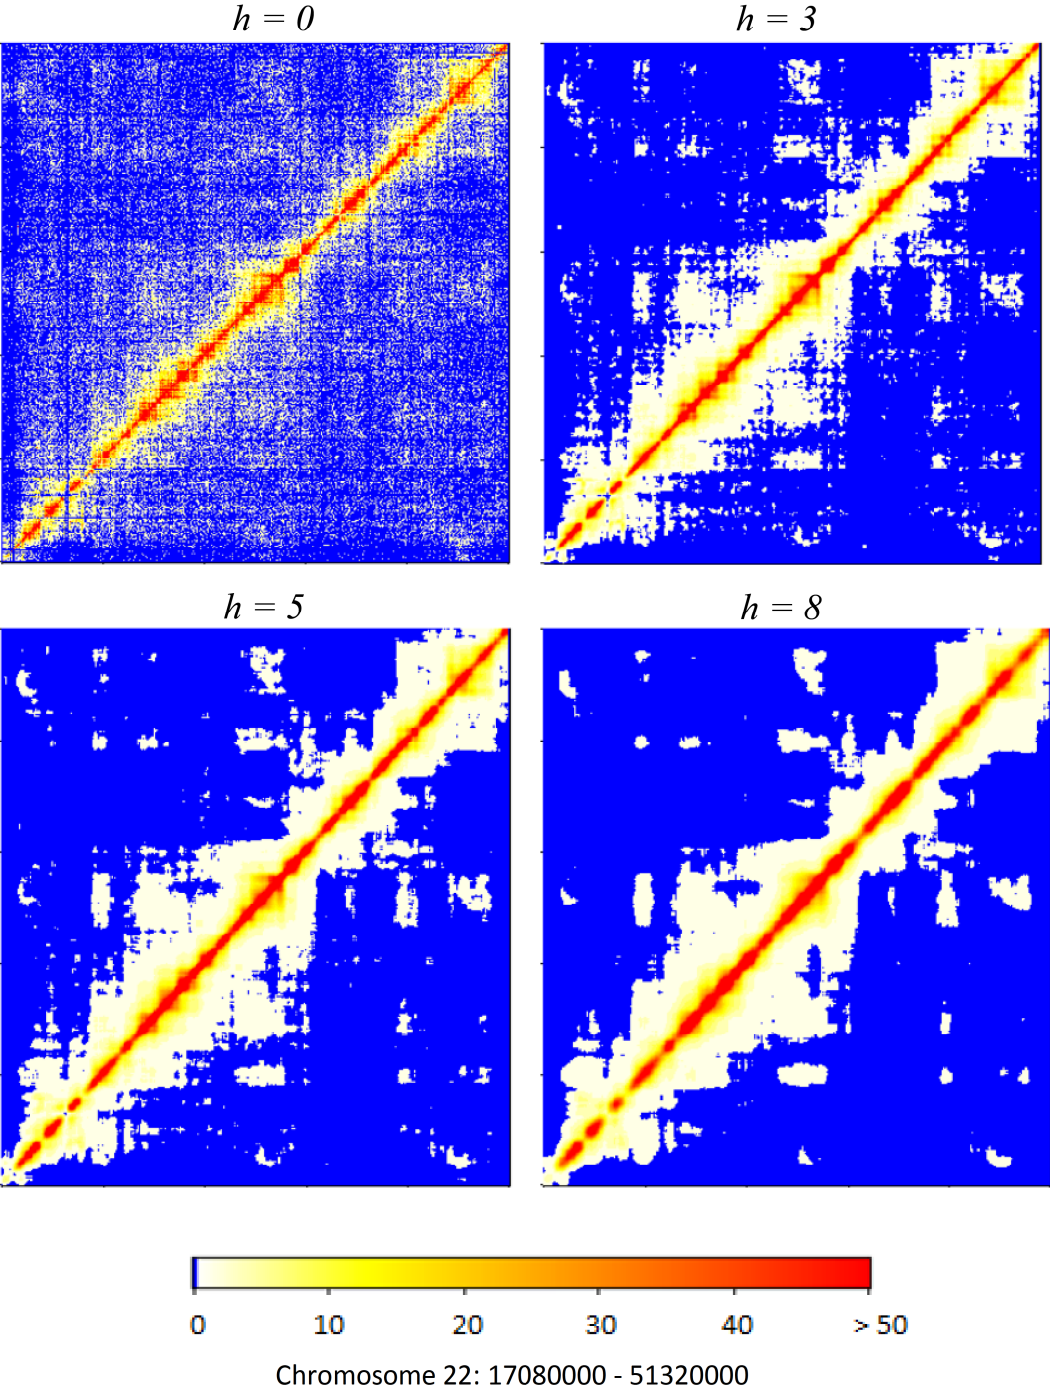

Supplement: supp_gr.220640.117_Supplemental_Fig_S6.pdf [file supp_gr.220640.117_Supplemental_Fig_S6.pdf]
