# Supplementary material for: HiCRep: assessing the reproducibility of Hi-C data using a stratum-adjusted correlation coefficient
Source: PubMed Central journal article supplement — Genome Res. 2017 Nov;27(11):1939–49. doi: 10.1101/gr.220640.117 (PMC5668950; doi:10.1101/gr.220640.117), 2017-11
Supplement: supp_gr.220640.117_Supplemental_File_S1.pdf [file supp_gr.220640.117_Supplemental_File_S1.pdf]

**Algorithm 1 – selection of optimal smoothing parameter**

**Input:** Hi-C raw contact map  $C_{n \times n}$

**Output:** Optimal span  $\hat{h}$

**Initialization:**  $h=0$

**1. For a given  $h$ ,**

a. Obtain smoothed map  $X(h)$  by computing

$$x_{ij}(h) = \frac{\sum_{m=\max(1,i-h)}^{\min(i+h,n)} \sum_{l=\max(1,j-h)}^{\min(j+h,n)} C_{ml}}{(1+2h)^2}$$

for  $i, j=1, \dots, n$

b. For  $t=1, \dots, T$

(i) Obtain  $X_t(h)$  by randomly sampling 10% reads from  $X(h)$

(ii) Calculate  $SCC_t(h)$  for  $X_t(h)$  using (7)

c. Compute  $SCC(h) = \frac{\sum_{t=1}^T SCC_t(h)}{T}$

**2. Let  $h=h+1$ , do Step 1**

**3. If  $SCC(h) - SCC(h-1) < 0.01$ , then go to Step 4**

**Otherwise do Step 2**

**4. Return  $\hat{h} = h-1$**
