# Supplementary material for: HiCRep: assessing the reproducibility of Hi-C data using a stratum-adjusted correlation coefficient
Source: HighWire-hosted journal article supplement (doi:10.1101/gr.220640.117), 2017-08-30
Supplement: Supplemental_Table_S1.xlsx [file Supplemental_Table_S1.xlsx]

## Sheet: Sheet1
Table S1 SCC, Pearson and Spearman correlations for biological, pseudo- and non-replicates generated from hESC and IMR90 data (Dixon et al, 2012).
	Rep1	Rep2	SCC	Pearson	Spearman
Original	hESC_PR1	hESC_PR2	0.964446	0.984086	0.554644
	IMR90_PR1	IMR90_PR2	0.98163	0.971573	0.532352
	hESC_R1	hESC_R2	0.878252	0.914794	0.370527
	IMR90_R1	IMR90_R2	0.956412	0.942121	0.46632
	hESC_R1	IMR90_R1	0.747753	0.865388	0.344019
	hESC_R1	IMR90_R2	0.719787	0.888236	0.340143
	hESC_R2	IMR90_R1	0.764315	0.91635	0.439042
	hESC_R2	IMR90_R2	0.735058	0.92415	0.43019
Down-sampled	hESC_PR1_ds	hESC_PR2_ds	0.953438	0.977769	0.512939
	IMR90_PR1_ds	IMR90_PR2_ds	0.977903	0.96597	0.504822
	hESC_R1_ds	hESC_R2_ds	0.870733	0.911359	0.382935
	IMR90_R1_ds	IMR90_R2_ds	0.952588	0.936957	0.447401
	hESC_R1_ds	IMR90_R1_ds	0.743618	0.862095	0.346635
	hESC_R1_ds	IMR90_R2_ds	0.718085	0.88719	0.341451
	hESC_R2_ds	IMR90_R1_ds	0.754371	0.909795	0.406655
	hESC_R2_ds	IMR90_R2_ds	0.727446	0.920351	0.405236
