# Supplementary material for: HiCRep: assessing the reproducibility of Hi-C data using a stratum-adjusted correlation coefficient
Source: HighWire-hosted journal article supplement (doi:10.1101/gr.220640.117), 2017-08-30
Supplement: Supplemental_Table_S2.xlsx [file Supplemental_Table_S2.xlsx]

## Sheet: Sheet1
Table S2 Reproducibility scores of biological replicates and non-replicates for the ENCODE 11 cancer cell lines, calculated using SCC, Pearson and Spearman correlations.
cell1	rep1	cell2	rep2	SCC	Pearson	Spearman	type
SKNDZ	R1	SKNDZ	R2	0.871094	0.723775	0.315277	BR
T47D	R1	T47D	R2	0.972277	0.869864	0.402551	BR
SKNMC	R1	SKNMC	R2	0.909355	0.659378	0.368282	BR
RPMI7951	R1	RPMI7951	R2	0.97247	0.87786	0.411897	BR
SKMEL5	R1	SKMEL5	R2	0.936744	0.898373	0.393931	BR
PANC1	R1	PANC1	R2	0.978537	0.897415	0.438464	BR
NCIH460	R1	NCIH460	R2	0.97005	0.829245	0.430912	BR
A549	R1	A549	R2	0.963881	0.886745	0.436072	BR
G401	R1	G401	R2	0.974664	0.950486	0.480323	BR
LNCaP	R1	LNCaP	R2	0.90626	0.777698	0.35887	BR
CAKi2	R2	CAKi2	R1	0.977785	0.944014	0.460814	BR
NCIH460	R2	SKMEL5	R2	0.75367	0.792206	0.385591	NR
NCIH460	R2	RPMI7951	R2	0.766494	0.833241	0.410504	NR
NCIH460	R2	SKNMC	R2	0.701653	0.664538	0.350674	NR
NCIH460	R2	PANC1	R2	0.766871	0.824508	0.421214	NR
NCIH460	R2	SKNDZ	R2	0.650175	0.619107	0.318355	NR
NCIH460	R2	T47D	R2	0.761259	0.81917	0.400014	NR
G401	R2	NCIH460	R2	0.769048	0.846296	0.412534	NR
G401	R2	SKMEL5	R2	0.72563	0.864798	0.368483	NR
G401	R2	RPMI7951	R2	0.76469	0.901579	0.434815	NR
G401	R2	SKNMC	R2	0.662223	0.686802	0.340267	NR
G401	R2	PANC1	R2	0.738167	0.909245	0.435569	NR
G401	R2	SKNDZ	R2	0.618769	0.647357	0.30481	NR
G401	R2	LNCaP	R2	0.729374	0.763241	0.353069	NR
G401	R2	T47D	R2	0.712216	0.886729	0.408386	NR
SKNDZ	R1	T47D	R1	0.674982	0.791217	0.369507	NR
SKNDZ	R1	SKNMC	R1	0.673703	0.749221	0.381502	NR
SKNMC	R1	T47D	R1	0.678504	0.788906	0.402352	NR
A549	R2	NCIH460	R2	0.831151	0.821835	0.411818	NR
A549	R2	G401	R2	0.788046	0.887453	0.411443	NR
A549	R2	SKMEL5	R2	0.76654	0.84061	0.407954	NR
A549	R2	RPMI7951	R2	0.801707	0.869153	0.412784	NR
A549	R2	SKNMC	R2	0.711082	0.729427	0.366254	NR
A549	R2	CAKi2	R1	0.803257	0.896061	0.423354	NR
A549	R2	PANC1	R2	0.780257	0.867241	0.428368	NR
A549	R2	SKNDZ	R2	0.669867	0.695396	0.33454	NR
A549	R2	LNCaP	R2	0.779636	0.791112	0.379501	NR
A549	R2	T47D	R2	0.76003	0.870052	0.411607	NR
RPMI7951	R1	SKNDZ	R1	0.661775	0.75868	0.365001	NR
RPMI7951	R1	T47D	R1	0.731607	0.838984	0.394715	NR
RPMI7951	R1	SKNMC	R1	0.686472	0.783932	0.406139	NR
RPMI7951	R1	SKMEL5	R1	0.741933	0.854755	0.416	NR
SKMEL5	R1	SKNDZ	R1	0.689252	0.82483	0.380655	NR
SKMEL5	R1	T47D	R1	0.737502	0.886527	0.413599	NR
SKMEL5	R1	SKNMC	R1	0.702957	0.800511	0.428531	NR
SKMEL5	R2	SKNMC	R2	0.63968	0.708045	0.353135	NR
SKMEL5	R2	SKNDZ	R2	0.613001	0.696575	0.332056	NR
SKMEL5	R2	T47D	R2	0.702783	0.838581	0.38708	NR
RPMI7951	R2	SKMEL5	R2	0.722811	0.840241	0.378943	NR
RPMI7951	R2	SKNMC	R2	0.664359	0.668607	0.344156	NR
RPMI7951	R2	SKNDZ	R2	0.622747	0.615725	0.308547	NR
RPMI7951	R2	T47D	R2	0.731821	0.869375	0.4045	NR
SKNMC	R2	T47D	R2	0.659841	0.721051	0.347896	NR
PANC1	R1	SKNDZ	R1	0.68073	0.767239	0.381427	NR
PANC1	R1	T47D	R1	0.729423	0.849853	0.410532	NR
PANC1	R1	SKNMC	R1	0.698283	0.783557	0.422529	NR
PANC1	R1	RPMI7951	R1	0.746961	0.846041	0.411376	NR
PANC1	R1	SKMEL5	R1	0.766793	0.886793	0.429896	NR
CAKi2	R1	NCIH460	R2	0.779116	0.844105	0.425806	NR
CAKi2	R1	G401	R2	0.747085	0.912298	0.452727	NR
CAKi2	R1	SKMEL5	R2	0.74478	0.881151	0.38505	NR
CAKi2	R1	RPMI7951	R2	0.77692	0.890165	0.441651	NR
CAKi2	R1	SKNMC	R2	0.689772	0.763738	0.352475	NR
CAKi2	R1	PANC1	R2	0.784644	0.904137	0.447545	NR
CAKi2	R1	SKNDZ	R2	0.629822	0.743038	0.31306	NR
CAKi2	R1	LNCaP	R2	0.720856	0.822541	0.36131	NR
CAKi2	R1	T47D	R2	0.741769	0.887339	0.415986	NR
PANC1	R2	SKMEL5	R2	0.735079	0.84701	0.400222	NR
PANC1	R2	RPMI7951	R2	0.750626	0.882212	0.428498	NR
PANC1	R2	SKNMC	R2	0.668192	0.670853	0.359345	NR
PANC1	R2	SKNDZ	R2	0.630468	0.628021	0.323833	NR
PANC1	R2	T47D	R2	0.717357	0.863003	0.41224	NR
SKNDZ	R2	SKNMC	R2	0.61679	0.804895	0.303167	NR
SKNDZ	R2	T47D	R2	0.641573	0.68652	0.316663	NR
NCIH460	R1	SKNDZ	R1	0.703062	0.760891	0.375222	NR
NCIH460	R1	T47D	R1	0.770695	0.839261	0.410598	NR
NCIH460	R1	SKNMC	R1	0.733854	0.792739	0.429543	NR
NCIH460	R1	RPMI7951	R1	0.765916	0.838173	0.413681	NR
NCIH460	R1	SKMEL5	R1	0.792432	0.860394	0.444105	NR
NCIH460	R1	PANC1	R1	0.777617	0.847375	0.427052	NR
LNCaP	R2	NCIH460	R2	0.752473	0.720881	0.362071	NR
LNCaP	R2	SKMEL5	R2	0.711489	0.773973	0.371304	NR
LNCaP	R2	RPMI7951	R2	0.725613	0.739848	0.357808	NR
LNCaP	R2	SKNMC	R2	0.687356	0.800281	0.335406	NR
LNCaP	R2	PANC1	R2	0.705345	0.740341	0.372171	NR
LNCaP	R2	SKNDZ	R2	0.652652	0.823284	0.314287	NR
LNCaP	R2	T47D	R2	0.737005	0.783584	0.361626	NR
A549	R1	SKNDZ	R1	0.700405	0.807154	0.390417	NR
A549	R1	T47D	R1	0.764022	0.877603	0.418325	NR
A549	R1	SKNMC	R1	0.728886	0.804495	0.432342	NR
A549	R1	RPMI7951	R1	0.794252	0.85173	0.414646	NR
A549	R1	SKMEL5	R1	0.797759	0.903542	0.43528	NR
A549	R1	PANC1	R1	0.782643	0.868411	0.433856	NR
A549	R1	NCIH460	R1	0.835213	0.855184	0.431867	NR
A549	R1	G401	R1	0.782443	0.902452	0.420281	NR
A549	R1	LNCaP	R1	0.776477	0.820706	0.393711	NR
A549	R1	CAKi2	R2	0.8085	0.904742	0.440906	NR
G401	R1	SKNDZ	R1	0.663525	0.814791	0.362145	NR
G401	R1	T47D	R1	0.714951	0.886619	0.404775	NR
G401	R1	SKNMC	R1	0.684229	0.816623	0.419426	NR
G401	R1	RPMI7951	R1	0.757878	0.870398	0.408965	NR
G401	R1	SKMEL5	R1	0.75418	0.923875	0.444729	NR
G401	R1	PANC1	R1	0.748734	0.899002	0.419833	NR
G401	R1	NCIH460	R1	0.777317	0.876518	0.441126	NR
G401	R1	LNCaP	R1	0.740043	0.83038	0.368728	NR
LNCaP	R1	SKNDZ	R1	0.696179	0.789221	0.361479	NR
LNCaP	R1	T47D	R1	0.737992	0.807476	0.377897	NR
LNCaP	R1	SKNMC	R1	0.709937	0.755142	0.38628	NR
LNCaP	R1	RPMI7951	R1	0.728167	0.772805	0.372005	NR
LNCaP	R1	SKMEL5	R1	0.752323	0.834249	0.384813	NR
LNCaP	R1	PANC1	R1	0.724611	0.783396	0.3911	NR
LNCaP	R1	NCIH460	R1	0.76402	0.773443	0.381363	NR
CAKi2	R2	SKNDZ	R1	0.680672	0.812069	0.380519	NR
CAKi2	R2	T47D	R1	0.756641	0.884853	0.4178	NR
CAKi2	R2	SKNMC	R1	0.729502	0.806094	0.42959	NR
CAKi2	R2	RPMI7951	R1	0.769553	0.861505	0.419977	NR
CAKi2	R2	SKMEL5	R1	0.779779	0.929598	0.451895	NR
CAKi2	R2	PANC1	R1	0.783208	0.888781	0.435218	NR
CAKi2	R2	NCIH460	R1	0.790575	0.867388	0.447377	NR
CAKi2	R2	G401	R1	0.752444	0.919598	0.445866	NR
CAKi2	R2	LNCaP	R1	0.738523	0.823904	0.383633	NR
