# Supplementary material for: HiCRep: assessing the reproducibility of Hi-C data using a stratum-adjusted correlation coefficient
Source: HighWire-hosted journal article supplement (doi:10.1101/gr.220640.117), 2017-08-30
Supplement: Supplemental_Table_S3.xlsx [file Supplemental_Table_S3.xlsx]

## Sheet: Sheet1
Table S3 The similarity scores for the 10 samples from the hESC and its derived lineages, calculated using SCC, Pearson and spearman correlations.
SCC
	ES_Rep1	ES_Rep2	ME_Rep1	ME_Rep2	NP_Rep1	NP_Rep2	TB_Rep1	TB_Rep2	MS_Rep1	MS_Rep2
ES_Rep1	1	0.954956	0.936405	0.921172	0.843871	0.858047	0.831074	0.839408	0.718205	0.707622
ES_Rep2	0.954956	1	0.93526	0.903728	0.845662	0.857531	0.823391	0.821339	0.742662	0.734279
ME_Rep1	0.936405	0.93526	1	0.954297	0.869307	0.876043	0.875775	0.880166	0.744941	0.738886
ME_Rep2	0.921172	0.903728	0.954297	1	0.844598	0.850758	0.881769	0.892195	0.755122	0.749758
NP_Rep1	0.843871	0.845662	0.869307	0.844598	1	0.913336	0.832253	0.834277	0.653598	0.647778
NP_Rep2	0.858047	0.857531	0.876043	0.850758	0.913336	1	0.850475	0.848055	0.663687	0.657662
TB_Rep1	0.831074	0.823391	0.875775	0.881769	0.832253	0.850475	1	0.969188	0.806234	0.80688
TB_Rep2	0.839408	0.821339	0.880166	0.892195	0.834277	0.848055	0.969188	1	0.80925	0.807426
MS_Rep1	0.718205	0.742662	0.744941	0.755122	0.653598	0.663687	0.806234	0.80925	1	0.991788
MS_Rep2	0.707622	0.734279	0.738886	0.749758	0.647778	0.657662	0.80688	0.807426	0.991788	1
Pearson
	ES_Rep1	ES_Rep2	ME_Rep1	ME_Rep2	NP_Rep1	NP_Rep2	TB_Rep1	TB_Rep2	MS_Rep1	MS_Rep2
ES_Rep1	1	0.978359	0.969803	0.978789	0.884428	0.875914	0.944706	0.955087	0.939636	0.938081
ES_Rep2	0.978359	1	0.980335	0.972701	0.890193	0.880822	0.959647	0.963657	0.937054	0.938901
ME_Rep1	0.969803	0.980335	1	0.961145	0.855822	0.841129	0.94957	0.947954	0.9308	0.93363
ME_Rep2	0.978789	0.972701	0.961145	1	0.901049	0.894944	0.944865	0.961919	0.949615	0.95035
NP_Rep1	0.884428	0.890193	0.855822	0.901049	1	0.974365	0.91209	0.928328	0.809858	0.811495
NP_Rep2	0.875914	0.880822	0.841129	0.894944	0.974365	1	0.904439	0.92394	0.800546	0.801739
TB_Rep1	0.944706	0.959647	0.94957	0.944865	0.91209	0.904439	1	0.970977	0.901456	0.904884
TB_Rep2	0.955087	0.963657	0.947954	0.961919	0.928328	0.92394	0.970977	1	0.914618	0.916682
MS_Rep1	0.939636	0.937054	0.9308	0.949615	0.809858	0.800546	0.901456	0.914618	1	0.993161
MS_Rep2	0.938081	0.938901	0.93363	0.95035	0.811495	0.801739	0.904884	0.916682	0.993161	1
Spearman
	ES_Rep1	ES_Rep2	ME_Rep1	ME_Rep2	NP_Rep1	NP_Rep2	TB_Rep1	TB_Rep2	MS_Rep1	MS_Rep2
ES_Rep1	1	0.532261	0.525708	0.509813	0.422689	0.427696	0.494653	0.504158	0.493148	0.50578
ES_Rep2	0.532261	1	0.562081	0.531075	0.430975	0.438153	0.517678	0.529639	0.524563	0.545897
ME_Rep1	0.525708	0.562081	1	0.531245	0.427985	0.436325	0.522021	0.532822	0.532272	0.55153
ME_Rep2	0.509813	0.531075	0.531245	1	0.422134	0.428692	0.500609	0.512202	0.509325	0.524279
NP_Rep1	0.422689	0.430975	0.427985	0.422134	1	0.379119	0.414654	0.420461	0.40914	0.416473
NP_Rep2	0.427696	0.438153	0.436325	0.428692	0.379119	1	0.422673	0.426884	0.413948	0.422093
TB_Rep1	0.494653	0.517678	0.522021	0.500609	0.414654	0.422673	1	0.511178	0.507758	0.524609
TB_Rep2	0.504158	0.529639	0.532822	0.512202	0.420461	0.426884	0.511178	1	0.523351	0.539556
MS_Rep1	0.493148	0.524563	0.532272	0.509325	0.40914	0.413948	0.507758	0.523351	1	0.608532
MS_Rep2	0.50578	0.545897	0.55153	0.524279	0.416473	0.422093	0.524609	0.539556	0.608532	1
