# Supplementary material for: HiCRep: assessing the reproducibility of Hi-C data using a stratum-adjusted correlation coefficient
Source: HighWire-hosted journal article supplement (doi:10.1101/gr.220640.117), 2017-08-30
Supplement: Supplemental_Table_S4.xlsx [file Supplemental_Table_S4.xlsx]

## Sheet: Sheet1
Table S4 The similarity scores for the 14 human primary tissues and two cell lines in Schmitt et al. (2016), calculated using SCC, Pearson and Spearman correlations.
SCC
	Adrenal_Gland	Aorta	Bladder	Cortex	GM12878	Hippocampus	IMR90	Lung	Liver	Left_Ventricle	Ovary	Pancreas	Psoas_Muscle	Right_Ventricle	Small_Bowel	Spleen
Adrenal_Gland	1	0.848125	0.870762	0.871401	0.750196	0.860591	0.751972	0.791498	0.900691	0.867465	0.749123	0.82654	0.761744	0.878829	0.818247	0.697183
Aorta	0.848125	1	0.890732	0.843251	0.721034	0.828866	0.774777	0.75294	0.839356	0.887745	0.819411	0.792387	0.808192	0.882726	0.746714	0.627527
Bladder	0.870762	0.890732	1	0.872801	0.71853	0.860487	0.831244	0.826934	0.848708	0.869779	0.838111	0.831823	0.787441	0.870026	0.772142	0.703083
Cortex	0.871401	0.843251	0.872801	1	0.774642	0.938396	0.736054	0.819751	0.875743	0.893235	0.768455	0.862093	0.803782	0.903747	0.787139	0.686851
GM12878	0.750196	0.721034	0.71853	0.774642	1	0.773717	0.593971	0.676675	0.829955	0.748844	0.589059	0.660008	0.687064	0.767026	0.629024	0.619267
Hippocampus	0.860591	0.828866	0.860487	0.938396	0.773717	1	0.726106	0.812985	0.865217	0.875865	0.76573	0.851028	0.8015	0.885605	0.758432	0.678188
IMR90	0.751972	0.774777	0.831244	0.736054	0.593971	0.726106	1	0.712406	0.694862	0.716062	0.774789	0.71404	0.633219	0.717702	0.671269	0.606981
Lung	0.791498	0.75294	0.826934	0.819751	0.676675	0.812985	0.712406	1	0.77222	0.770578	0.699457	0.868477	0.751971	0.781421	0.781336	0.802213
Liver	0.900691	0.839356	0.848708	0.875743	0.829955	0.865217	0.694862	0.77222	1	0.8816	0.713786	0.802731	0.768338	0.893629	0.823204	0.709202
Left_Ventricle	0.867465	0.887745	0.869779	0.893235	0.748844	0.875865	0.716062	0.770578	0.8816	1	0.771006	0.822042	0.816718	0.954085	0.808589	0.634609
Ovary	0.749123	0.819411	0.838111	0.768455	0.589059	0.76573	0.774789	0.699457	0.713786	0.771006	1	0.732241	0.687122	0.759115	0.633767	0.543443
Pancreas	0.82654	0.792387	0.831823	0.862093	0.660008	0.851028	0.71404	0.868477	0.802731	0.822042	0.732241	1	0.787299	0.832369	0.827066	0.777902
Psoas_Muscle	0.761744	0.808192	0.787441	0.803782	0.687064	0.8015	0.633219	0.751971	0.768338	0.816718	0.687122	0.787299	1	0.813254	0.690315	0.647106
Right_Ventricle	0.878829	0.882726	0.870026	0.903747	0.767026	0.885605	0.717702	0.781421	0.893629	0.954085	0.759115	0.832369	0.813254	1	0.823336	0.6495
Small_Bowel	0.818247	0.746714	0.772142	0.787139	0.629024	0.758432	0.671269	0.781336	0.823204	0.808589	0.633767	0.827066	0.690315	0.823336	1	0.715439
Spleen	0.697183	0.627527	0.703083	0.686851	0.619267	0.678188	0.606981	0.802213	0.709202	0.634609	0.543443	0.777902	0.647106	0.6495	0.715439	1
Pearson
	Adrenal_Gland	Aorta	Bladder	Cortex	GM12878	Hippocampus	IMR90	Lung	Liver	Left_Ventricle	Ovary	Pancreas	Psoas_Muscle	Right_Ventricle	Small_Bowel	Spleen
Adrenal_Gland	1	0.804291	0.742066	0.726499	0.790056	0.732494	0.817649	0.619733	0.829023	0.798033	0.643006	0.731888	0.563691	0.79779	0.673279	0.600948
Aorta	0.804291	1	0.812761	0.780188	0.845836	0.785825	0.891609	0.658345	0.903391	0.881802	0.708495	0.779177	0.61086	0.875929	0.725574	0.641404
Bladder	0.742066	0.812761	1	0.732311	0.793558	0.734879	0.827682	0.631387	0.832148	0.810247	0.653922	0.737824	0.572651	0.805997	0.678484	0.617815
Cortex	0.726499	0.780188	0.732311	1	0.794244	0.747345	0.7924	0.628468	0.80914	0.774052	0.636932	0.729979	0.565027	0.779866	0.662058	0.601637
GM12878	0.790056	0.845836	0.793558	0.794244	1	0.797967	0.883846	0.694702	0.904761	0.846192	0.674022	0.790404	0.614054	0.849139	0.717711	0.683443
Hippocampus	0.732494	0.785825	0.734879	0.747345	0.797967	1	0.795007	0.627992	0.813914	0.780929	0.636478	0.727233	0.56736	0.786534	0.664091	0.598896
IMR90	0.817649	0.891609	0.827682	0.7924	0.883846	0.795007	1	0.694564	0.927317	0.889348	0.70884	0.807771	0.627303	0.881687	0.736511	0.710337
Lung	0.619733	0.658345	0.631387	0.628468	0.694702	0.627992	0.694564	1	0.693517	0.657986	0.542308	0.660218	0.509413	0.663841	0.581276	0.603831
Liver	0.829023	0.903391	0.832148	0.80914	0.904761	0.813914	0.927317	0.693517	1	0.904941	0.717401	0.807359	0.634411	0.900569	0.748721	0.693701
Left_Ventricle	0.798033	0.881802	0.810247	0.774052	0.846192	0.780929	0.889348	0.657986	0.904941	1	0.698107	0.776655	0.609993	0.887299	0.722331	0.651555
Ovary	0.643006	0.708495	0.653922	0.636932	0.674022	0.636478	0.70884	0.542308	0.717401	0.698107	1	0.63579	0.494345	0.696376	0.5851	0.537708
Pancreas	0.731888	0.779177	0.737824	0.729979	0.790404	0.727233	0.807771	0.660218	0.807359	0.776655	0.63579	1	0.591792	0.77994	0.685754	0.678929
Psoas_Muscle	0.563691	0.61086	0.572651	0.565027	0.614054	0.56736	0.627303	0.509413	0.634411	0.609993	0.494345	0.591792	1	0.61119	0.5231	0.538798
Right_Ventricle	0.79779	0.875929	0.805997	0.779866	0.849139	0.786534	0.881687	0.663841	0.900569	0.887299	0.696376	0.77994	0.61119	1	0.723725	0.648176
Small_Bowel	0.673279	0.725574	0.678484	0.662058	0.717711	0.664091	0.736511	0.581276	0.748721	0.722331	0.5851	0.685754	0.5231	0.723725	1	0.575645
Spleen	0.600948	0.641404	0.617815	0.601637	0.683443	0.598896	0.710337	0.603831	0.693701	0.651555	0.537708	0.678929	0.538798	0.648176	0.575645	1
Spearman
	Adrenal_Gland	Aorta	Bladder	Cortex	GM12878	Hippocampus	IMR90	Lung	Liver	Left_Ventricle	Ovary	Pancreas	Psoas_Muscle	Right_Ventricle	Small_Bowel	Spleen
Adrenal_Gland	1	0.39987	0.359841	0.375697	0.410294	0.372569	0.419939	0.32225	0.417674	0.39189	0.312218	0.374055	0.278286	0.388181	0.335514	0.313609
Aorta	0.39987	1	0.418593	0.428682	0.54252	0.433531	0.576841	0.360689	0.547846	0.469871	0.339359	0.436715	0.287512	0.461854	0.367836	0.329669
Bladder	0.359841	0.418593	1	0.378467	0.430305	0.378296	0.45305	0.323496	0.438384	0.398283	0.312804	0.379828	0.271871	0.393272	0.334735	0.308478
Cortex	0.375697	0.428682	0.378467	1	0.453689	0.399896	0.461025	0.336558	0.46264	0.418892	0.317825	0.396083	0.280087	0.413908	0.344459	0.318122
GM12878	0.410294	0.54252	0.430305	0.453689	1	0.458105	0.624131	0.379468	0.604337	0.497698	0.341797	0.453422	0.288814	0.484729	0.380455	0.345774
Hippocampus	0.372569	0.433531	0.378296	0.399896	0.458105	1	0.466153	0.339252	0.465282	0.415885	0.31661	0.395393	0.279057	0.414452	0.345365	0.315179
IMR90	0.419939	0.576841	0.45305	0.461025	0.624131	0.466153	1	0.390176	0.617617	0.506142	0.356991	0.470721	0.296634	0.492654	0.392231	0.353776
Lung	0.32225	0.360689	0.323496	0.336558	0.379468	0.339252	0.390176	1	0.381519	0.34908	0.277114	0.338868	0.251458	0.346415	0.303202	0.28861
Liver	0.417674	0.547846	0.438384	0.46264	0.604337	0.465282	0.617617	0.381519	1	0.505911	0.350283	0.464835	0.297771	0.494551	0.391147	0.347301
Left_Ventricle	0.39189	0.469871	0.398283	0.418892	0.497698	0.415885	0.506142	0.34908	0.505911	1	0.329391	0.417583	0.288125	0.445489	0.358647	0.324864
Ovary	0.312218	0.339359	0.312804	0.317825	0.341797	0.31661	0.356991	0.277114	0.350283	0.329391	1	0.317966	0.250068	0.327362	0.287538	0.274884
Pancreas	0.374055	0.436715	0.379828	0.396083	0.453422	0.395393	0.470721	0.338868	0.464835	0.417583	0.317966	1	0.28082	0.413753	0.349708	0.322383
Psoas_Muscle	0.278286	0.287512	0.271871	0.280087	0.288814	0.279057	0.296634	0.251458	0.297771	0.288125	0.250068	0.28082	1	0.287916	0.260357	0.253213
Right_Ventricle	0.388181	0.461854	0.393272	0.413908	0.484729	0.414452	0.492654	0.346415	0.494551	0.445489	0.327362	0.413753	0.287916	1	0.358821	0.326042
Small_Bowel	0.335514	0.367836	0.334735	0.344459	0.380455	0.345365	0.392231	0.303202	0.391147	0.358647	0.287538	0.349708	0.260357	0.358821	1	0.293261
Spleen	0.313609	0.329669	0.308478	0.318122	0.345774	0.315179	0.353776	0.28861	0.347301	0.324864	0.274884	0.322383	0.253213	0.326042	0.293261	1
