# Supplementary material for: HiCRep: assessing the reproducibility of Hi-C data using a stratum-adjusted correlation coefficient
Source: HighWire-hosted journal article supplement (doi:10.1101/gr.220640.117), 2017-08-30
Supplement: Supplemental_Table_S5.xlsx [file Supplemental_Table_S5.xlsx]

## Sheet: Sheet1
Table S5 Similarity between H1 ES cell and its derived cells at different resolutions, measured by SCC, Pearson and Spearman correlations.
SCC
Rep1	Rep2	10Kb	25Kb	40Kb	100Kb	500Kb	1Mb
H1ESC_Rep1	H1ESC_Rep2	0.951999	0.953496	0.954758	0.968589	0.97789	0.972015
H1ESC_Rep1	H1MES_Rep1	0.932839	0.934245	0.936002	0.953075	0.972552	0.959184
H1ESC_Rep1	H1NPC_Rep1	0.836487	0.839554	0.842829	0.875509	0.904682	0.874302
H1ESC_Rep1	H1TRO_Rep1	0.829188	0.829535	0.830277	0.842614	0.862872	0.832928
H1ESC_Rep1	H1MSC_Rep1	0.715593	0.716044	0.716817	0.725518	0.776088	0.739063
Pearson
Rep1	Rep2	10Kb	25Kb	40Kb	100Kb	500Kb	1Mb
H1ESC_Rep1	H1ESC_Rep2	0.8903	0.9646	0.9784	0.9878	0.9921	0.9934
H1ESC_Rep1	H1MES_Rep1	0.8859	0.9565	0.9698	0.9814	0.9905	0.9942
H1ESC_Rep1	H1NPC_Rep1	0.7029	0.8359	0.8819	0.9378	0.984	0.989
H1ESC_Rep1	H1TRO_Rep1	0.7745	0.9139	0.9449	0.9686	0.9761	0.9777
H1ESC_Rep1	H1MSC_Rep1	0.8501	0.9205	0.9384	0.9632	0.9742	0.9777
Spearman
Rep1	Rep2	10Kb	25Kb	40Kb	100Kb	500Kb	1Mb
H1ESC_Rep1	H1ESC_Rep2	-0.0374	0.0945	0.2192	0.6365	0.9635	0.9862
H1ESC_Rep1	H1MES_Rep1	-0.0095	0.0928	0.2086	0.617	0.9283	0.9538
H1ESC_Rep1	H1NPC_Rep1	-0.2457	-0.0672	0.0278	0.3995	0.8705	0.9358
H1ESC_Rep1	H1TRO_Rep1	-0.1942	0.0152	0.1311	0.5357	0.8548	0.8876
H1ESC_Rep1	H1MSC_Rep1	-0.0784	0.0191	0.1161	0.4691	0.6725	0.7126
