# Supplementary material for: HiCRep: assessing the reproducibility of Hi-C data using a stratum-adjusted correlation coefficient
Source: HighWire-hosted journal article supplement (doi:10.1101/gr.220640.117), 2017-08-30
Supplement: Supplemental_Table_S6.xlsx [file Supplemental_Table_S6.xlsx]

## Sheet: Sheet1
Table S6 The reproducibility scores (SCC, Pearson and Spearman) and Jaccard index of significant contacts identified by Fit-Hi-C between biological replicates for the hESC and its derived cell lineages at different downsampling levels.
cell	proportion	SCC	Pearson	Spearman	Jaccard_Index
ES	0.25	0.913653	0.956011	0.42385	0.413978
ES	0.5	0.941128	0.971232	0.465986	0.481145
ES	0.75	0.95131	0.975662	0.501808	0.526295
ES	1	0.954956	0.978359	0.532261	0.560641
ME	0.25	0.909432	0.943735	0.426889	0.41608
ME	0.5	0.939283	0.955025	0.464147	0.482505
ME	0.75	0.949232	0.958743	0.499923	0.529983
ME	1	0.954297	0.961145	0.531245	0.559735
NP	0.25	0.805665	0.937264	0.316567	0.302959
NP	0.5	0.873642	0.961288	0.345512	0.349192
NP	0.75	0.89947	0.970134	0.362902	0.369695
NP	1	0.913336	0.974365	0.379119	0.381859
TB	0.25	0.913423	0.918849	0.396794	0.411603
TB	0.5	0.950704	0.953611	0.44242	0.479916
TB	0.75	0.960726	0.964765	0.480326	0.526032
TB	1	0.969188	0.970977	0.511178	0.557908
MS	0.25	0.974386	0.979822	0.446186	0.419161
MS	0.5	0.985414	0.98873	0.5167	0.480302
MS	0.75	0.989486	0.991421	0.569267	0.521443
MS	1	0.991788	0.993161	0.608532	0.549296
