# Supplementary material for: HiCRep: assessing the reproducibility of Hi-C data using a stratum-adjusted correlation coefficient
Source: HighWire-hosted journal article supplement (doi:10.1101/gr.220640.117), 2017-08-30
Supplement: Supplemental_Table_S7.xlsx [file Supplemental_Table_S7.xlsx]

## Sheet: Sheet1
Table S7 The SCC and its standard error for biological replicates of hESC cell and A549 cell at different subsamples (10%-100%).
LS	Proportion	SCC	SD
ES	0.1	0.847145	0.00103496
ES	0.2	0.90165	0.000714439
ES	0.3	0.923116	0.000570745
ES	0.4	0.935846	0.000475685
ES	0.5	0.941128	0.000438385
ES	0.6	0.946808	0.000394139
ES	0.7	0.95096	0.000365044
ES	0.8	0.952265	0.000355981
ES	0.9	0.953453	0.000345221
ES	1	0.954956	0.000333779
A549	0.1	0.437396	0.00280156
A549	0.2	0.622497	0.00242327
A549	0.3	0.715638	0.00214376
A549	0.4	0.784911	0.00190698
A549	0.5	0.820952	0.0017564
A549	0.6	0.842522	0.00165584
A549	0.7	0.860845	0.00155963
A549	0.8	0.885565	0.00143092
A549	0.9	0.905586	0.00130712
A549	1	0.915737	0.00123813
