# Supplementary material for: HiCRep: assessing the reproducibility of Hi-C data using a stratum-adjusted correlation coefficient
Source: HighWire-hosted journal article supplement (doi:10.1101/gr.220640.117), 2017-08-30
Supplement: Supplemental_Table_S8.xlsx [file Supplemental_Table_S8.xlsx]

## Sheet: Sheet1
Table S8 The sequencing depths of the Hi-C data for the 11 ENCODE cancer cell lines.
Cell line	Rep1 coverage	Rep2 coverage
	(Million reads)	(Million reads)
A549	33.0284	30.1677
CAK12	47.0327	36.2973
G401	61.2785	52.9884
LNCaP	17.9762	15.3571
NCIH460	41.5799	28.8922
PANC1	37.4542	50.5357
RPMI7951C	31.9537	48.7649
SKMEL5	45.7425	10.6515
SKNDZ	15.6313	9.81318
SKNMC	24.9146	12.5784
T470	33.9027	35.9571
